# Supplementary material for: Picroside II attenuates fatty acid accumulation in HepG2 cells via modulation of fatty acid uptake and synthesis
Source: PubMed Central journal article supplement — Clin Mol Hepatol. 2017 Dec 19;24(1):77–87. doi: 10.3350/cmh.2017.0039 (PMC5875197; doi:10.3350/cmh.2017.0039), 2017-12-19
Supplement: cmh-2017-0039-suppl.pdf [file cmh-2017-0039-suppl.pdf]

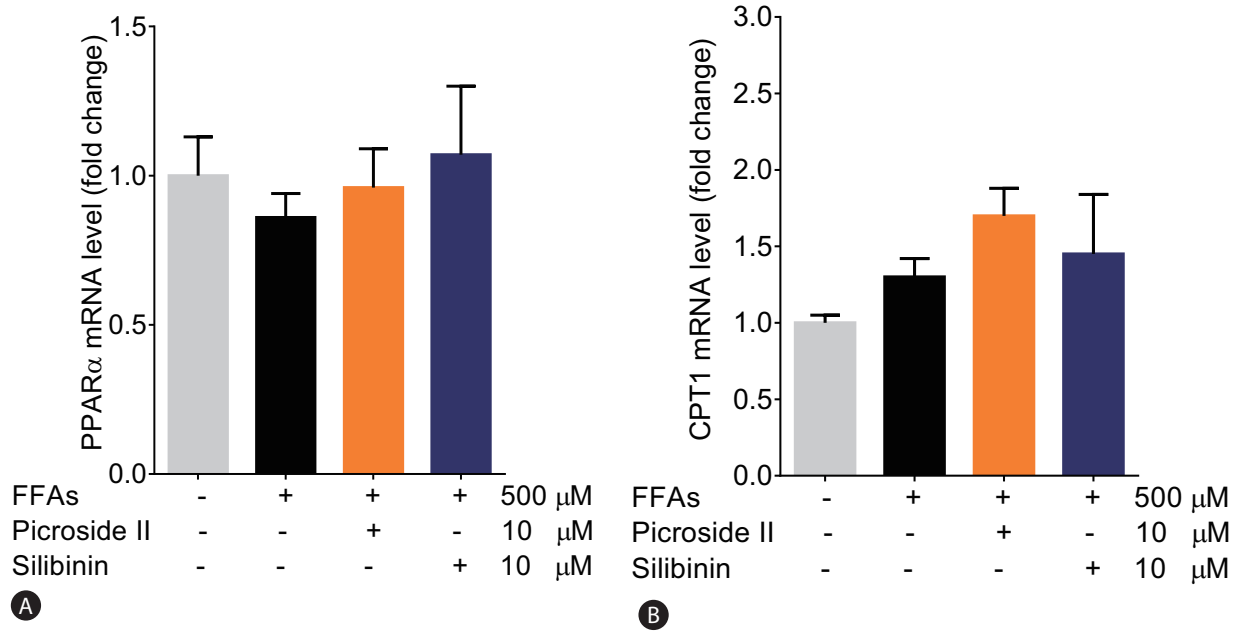

**Supplementary Figure 1.** Picoside II effects on  $\beta$ -oxidation genes: HepG2 cells were pretreated with picoside II and silibinin at a concentration of 10  $\mu$ M, 2 hours prior to FFA (500  $\mu$ M) loading for 20 hours followed by RT-PCR analysis of PPAR $\alpha$  (A) and CPT1 (B). Values are expressed as mean $\pm$ SEM from four independent replicates. FFAs, free fatty acids; RT-PCR, reverse transcription polymerase chain reaction; PPAR $\alpha$ , peroxisome proliferator activated receptor  $\alpha$ ; CPT1, carnitine palmitoyltransferase 1; SEM, standard errors of mean.
